# Supplementary material for: The Central domain of RyR1 is the transducer for long-range allosteric gating of channel opening
Source: PubMed Central journal article supplement — Cell Res. 2016 Jul 29;26(9):995–1006. doi: 10.1038/cr.2016.89 (PMC5034110; doi:10.1038/cr.2016.89), 2016-07-29
Supplement: cr201689x1.pdf [file cr201689x1.pdf]

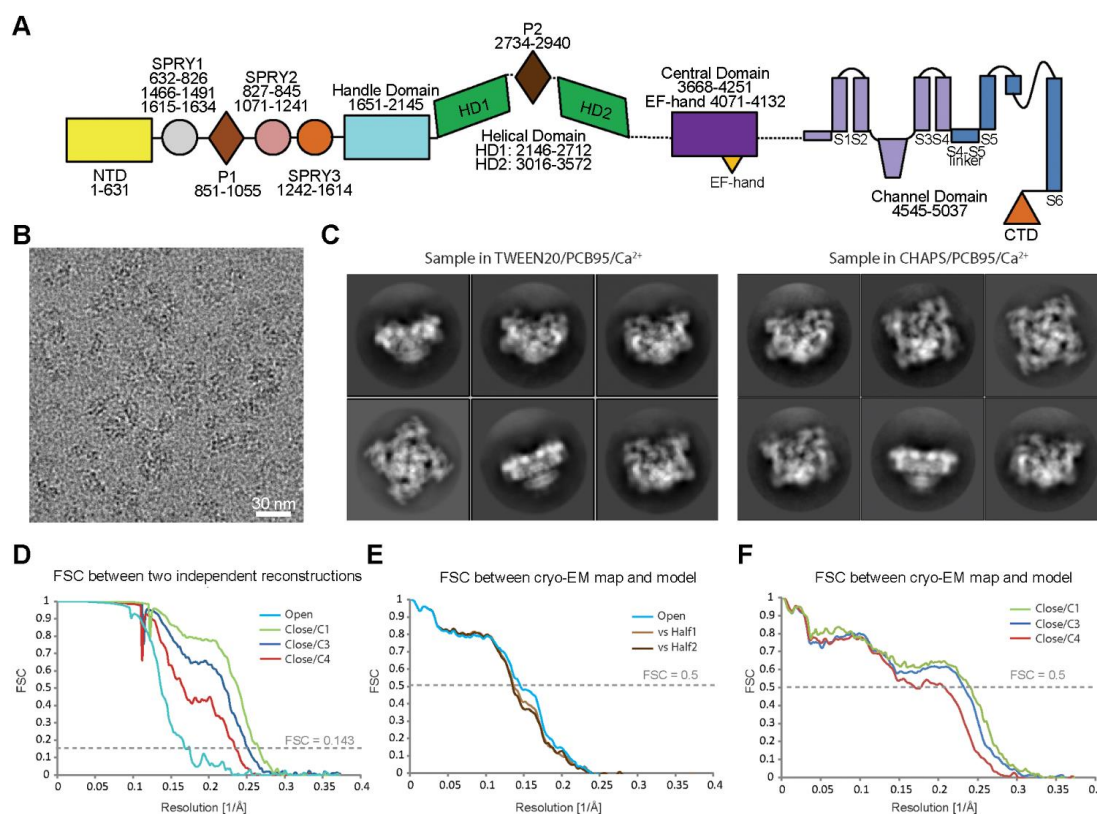

**Supplementary information, Figure S1** Image processing and resolution estimation.

(A) A schematic illustration of domain organization in one RyR1 protomer. The name and boundary of each domain are labeled. The panel is adapted from our previous publication on RyR1<sup>1</sup>. (B) A representative micrograph. Scale bar, 30 nm. (C) Representative 2D class averages of the sample in Tween-20 and in CHAPS. (D) Gold-standard FSC curves for the maps in both open and close states. (E) FSC curves of model versus map for the map in the open state and cross-validation of model refinement by half maps. The light grey curves show FSC between the model and the half-map it was refined against (half1) and the dark grey curves show FSC between the model and the other half-map (half2) it was not refined against. The blue curves show FSC between the atomic model and the sum map, which the model was refined against. (F) FSC curves of model versus map for the maps in different close states.

<sup>1</sup> Yan Z, Bai XC, Yan C *et al.* Structure of the rabbit ryanodine receptor RyR1 at near-atomic resolution. *Nature* 2015; **517**:50-55.
