# Supplementary material for: The Central domain of RyR1 is the transducer for long-range allosteric gating of channel opening
Source: PubMed Central journal article supplement — Cell Res. 2016 Jul 29;26(9):995–1006. doi: 10.1038/cr.2016.89 (PMC5034110; doi:10.1038/cr.2016.89), 2016-07-29
Supplement: cr201689x2.pdf [file cr201689x2.pdf]

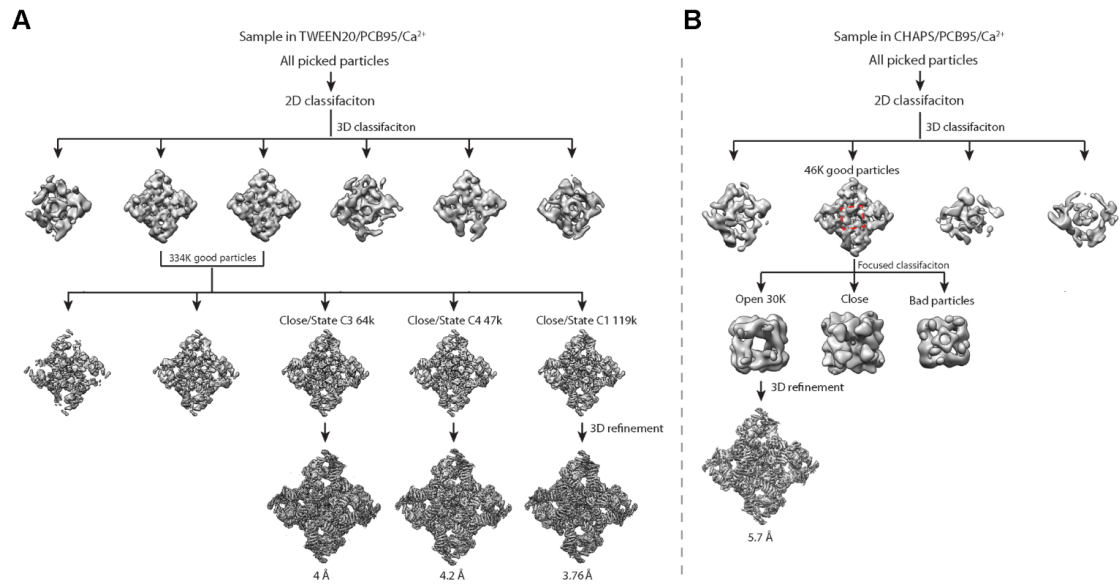

**Supplementary information, Figure S2 3D classification scheme.**

(A) Classification scheme used to separate the particles set into different close conformational states. (B) Classification scheme used to localize the sub-population of particles in the open state. Details can be found in Methods.
