# Supplementary material for: The Central domain of RyR1 is the transducer for long-range allosteric gating of channel opening
Source: PubMed Central journal article supplement — Cell Res. 2016 Jul 29;26(9):995–1006. doi: 10.1038/cr.2016.89 (PMC5034110; doi:10.1038/cr.2016.89), 2016-07-29
Supplement: cr201689x3.pdf [file cr201689x3.pdf]

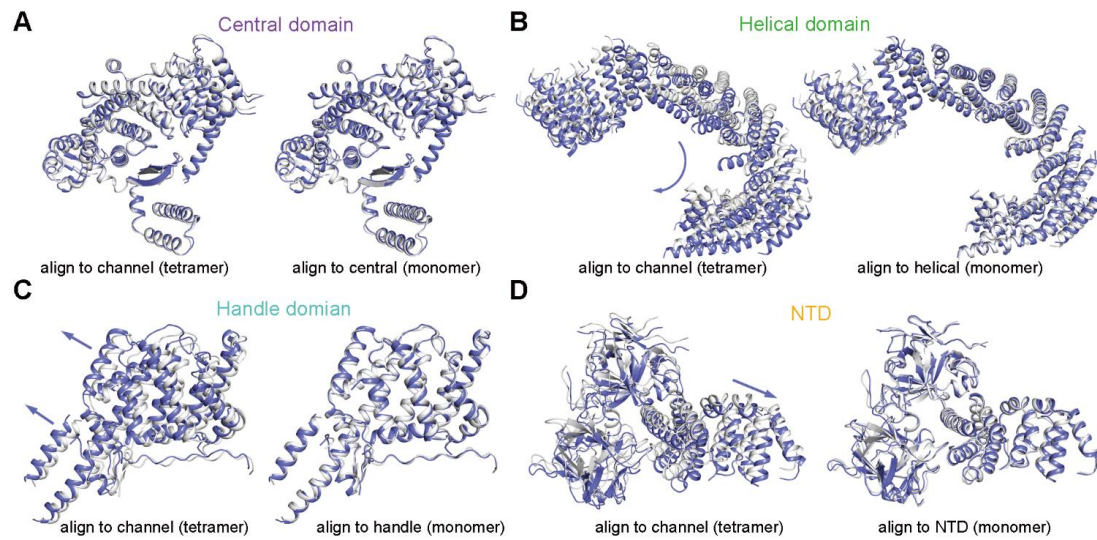

**Supplementary information, Figure S3** Structural superimposition of cytoplasmic domains between C1 (gray) and C4 (violet).

**(A-D)** Comparison of the Central domain (**A**), Helical domain (**B**), Handle domain (**C**) and NTD (**D**) between the C1 and C4 structures using two different strategies. *Left* in each panel: Structural superimposition relative to the tetrameric channel domain. *Right* in each panel: Domain-wise comparison.
