# Supplementary material for: The Central domain of RyR1 is the transducer for long-range allosteric gating of channel opening
Source: PubMed Central journal article supplement — Cell Res. 2016 Jul 29;26(9):995–1006. doi: 10.1038/cr.2016.89 (PMC5034110; doi:10.1038/cr.2016.89), 2016-07-29
Supplement: cr201689x5.pdf [file cr201689x5.pdf]

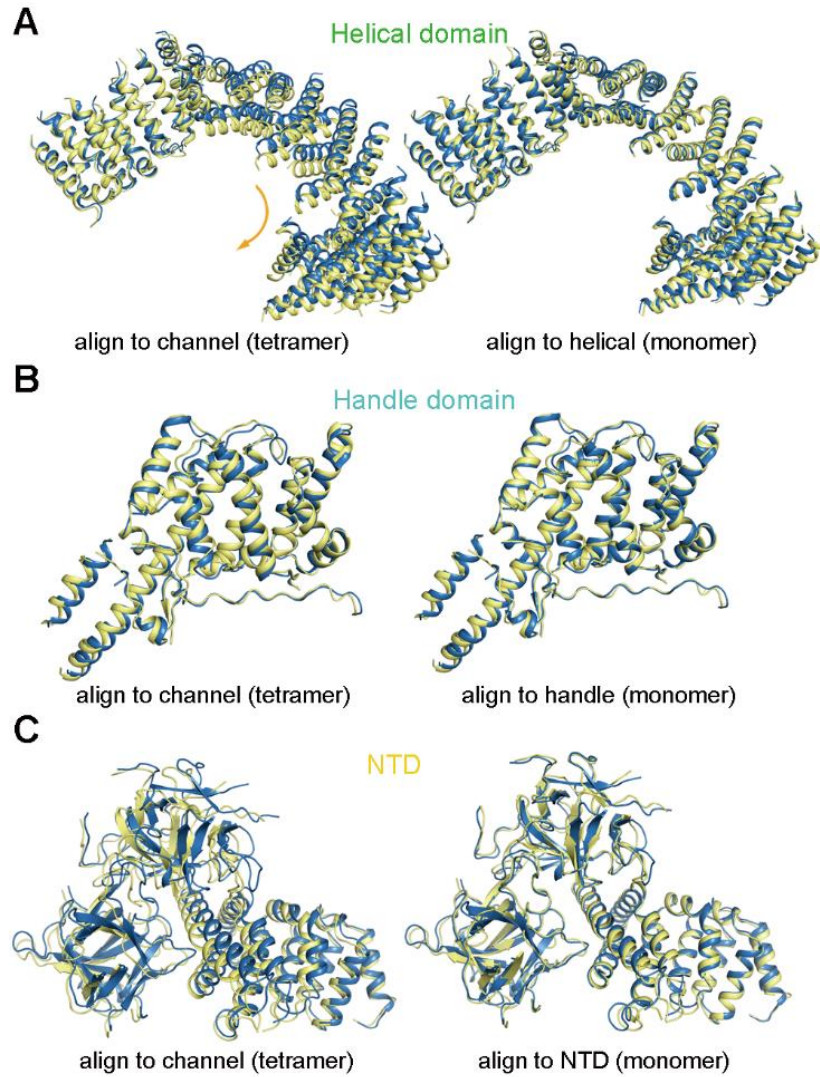

**Supplementary information, Figure S5** Structural comparison of the cytoplasmic domains between the open (yellow) and the C3 (dark blue)-state RyR1.

(A-C) Superimposition of the Helical domain (A), Handle domain (B) and NTD (C) between the open and C3 structures using two strategies as in Supplementary information, Figure S3.
