# Supplementary material for: The Central domain of RyR1 is the transducer for long-range allosteric gating of channel opening
Source: PubMed Central journal article supplement — Cell Res. 2016 Jul 29;26(9):995–1006. doi: 10.1038/cr.2016.89 (PMC5034110; doi:10.1038/cr.2016.89), 2016-07-29
Supplement: cr201689x6.pdf [file cr201689x6.pdf]

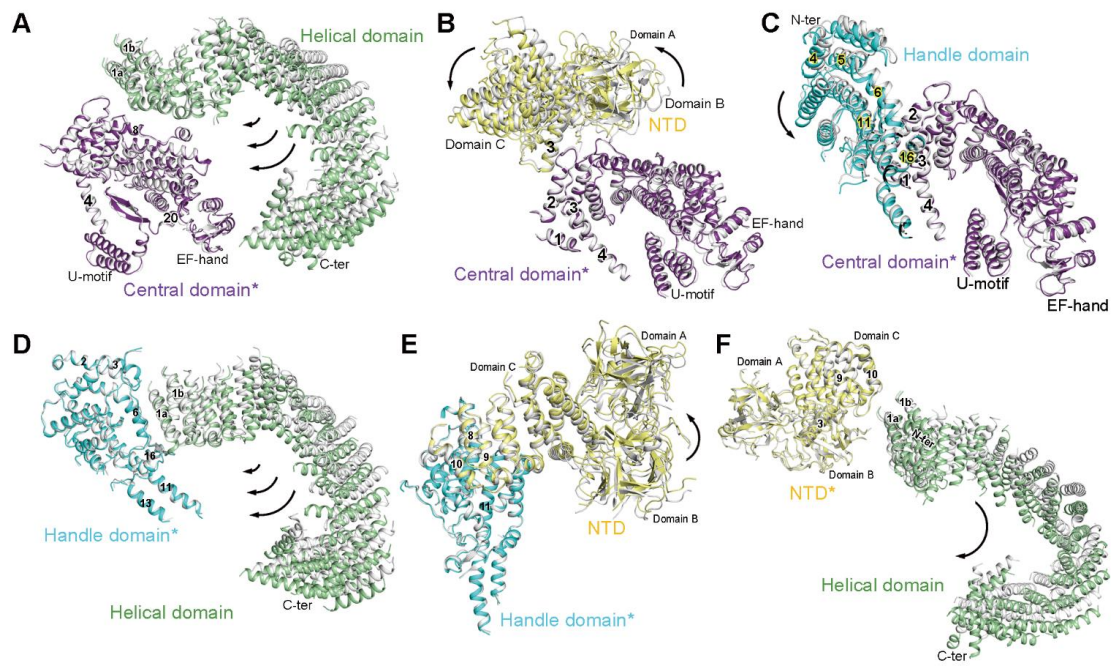

**Supplementary information, Figure S6** Relative motion among the armadillo repeats-containing domains between the C1 and C4 conformers.

(A-F) In each panel, two contiguous cytoplasmic domains are shown, and the superimposition is relative to the one labeled with asterisk. In all panels, domains in C1 are colored gray, and those in C4 are domain-colored.
