# Supplementary material for: The Central domain of RyR1 is the transducer for long-range allosteric gating of channel opening
Source: PubMed Central journal article supplement — Cell Res. 2016 Jul 29;26(9):995–1006. doi: 10.1038/cr.2016.89 (PMC5034110; doi:10.1038/cr.2016.89), 2016-07-29
Supplement: cr201689x11.pdf [file cr201689x11.pdf]

**Supplementary information, Table S1** Data collection and model statistics

---

| <b>Data collection</b>                          |                   |      |      |      |
|-------------------------------------------------|-------------------|------|------|------|
| EM equipment                                    | FEI Tecnai Polara |      |      |      |
| Voltage (kV)                                    | 300               |      |      |      |
| Detector                                        | Falcon III        |      |      |      |
| Pixel size (Å)                                  | 1.34              |      |      |      |
| Electron dose (e <sup>-</sup> /Å <sup>2</sup> ) | 40                |      |      |      |
| Defocus range (µm)                              | 1.8-5             |      |      |      |
| Micrographs                                     |                   |      |      |      |
| <b>Reconstruction</b>                           |                   |      |      |      |
| Software                                        | RELION 1.4        |      |      |      |
| Maps                                            | C1                | C3   | C4   | open |
| Symmetry                                        | C 4               |      |      |      |
| Final Resolution (Å)                            | 3.8               | 4.2  | 4.0  | 5.7  |
| Map sharpening B-factor (Å <sup>2</sup> )       | 110               | 110  | 130  | 450  |
| Accuracy of rotations (°)                       | 0.7               | 0.7  | 0.8  | 1    |
| Accuracy of translation (pixels)                | 0.6               | 0.6  | 0.7  | 0.9  |
| <b>Model building</b>                           |                   |      |      |      |
| Software                                        | DireX & Coot      |      |      |      |
| <b>Refinement</b>                               |                   |      |      |      |
| Software                                        | Refmac & Phenix   |      |      |      |
| Average Fourier shell correlation               | 0.84              | 0.77 | 0.85 | 0.90 |
| R-factor                                        | 0.30              | 0.30 | 0.30 | 0.28 |
| <b>Validation</b>                               |                   |      |      |      |
| R.m.s deviations                                |                   |      |      |      |
| Bonds length (Å)                                | 0.01              | 0.01 | 0.01 | 0.01 |
| Bonds Angle (°)                                 | 1.32              | 1.56 | 1.47 | 1.58 |
| Ramachandran plot statistics (%)                |                   |      |      |      |
| Preferred                                       | 92.2              | 91.6 | 91.0 | 90.5 |
| Allowed                                         | 5.5               | 6.1  | 6.1  | 6.8  |
| Outlier                                         | 2.3               | 2.3  | 2.9  | 2.7  |

---
